# Supplementary material for: Cancer-specific tissue-resident memory T-cells express ZNF683 in colorectal cancer
Source: PubMed Central journal article supplement (PMC10147592; doi:10.1038/s41416-023-02202-4), 2023-03-03
Supplement: 41416_2023_2202_MOESM1_ESM.pdf [file 41416_2023_2202_MOESM1_ESM.pdf]

**Supplementary Fig. 1. Selection of Trm markers in colorectal cancer**

**a.** Analysis of the distribution of CD8, CD103, and CD69 expression on T cells (CD45<sup>+</sup>, CD3<sup>+</sup>) in the immune cell populations of colorectal cancer tumors using flow cytometry. **b.** The percentage of CD103 expression on CD8<sup>+</sup> T cells was approximately 50% of CD8<sup>+</sup> T cells, and the percentage varied among cases. **c.** The expression of CD69 in CD8<sup>+</sup> CD103<sup>+</sup> T cells was more than 90%.

**a**

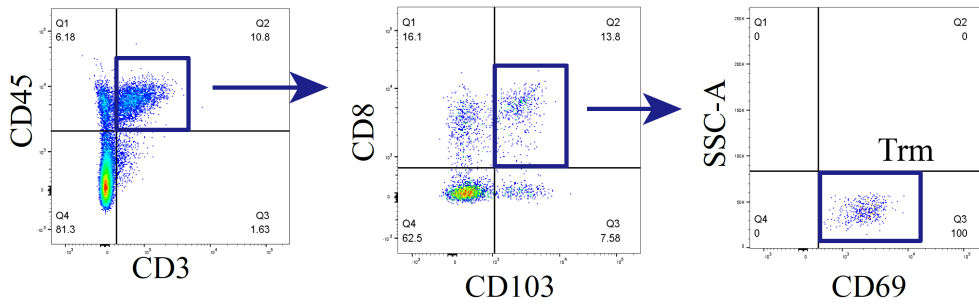

**b**

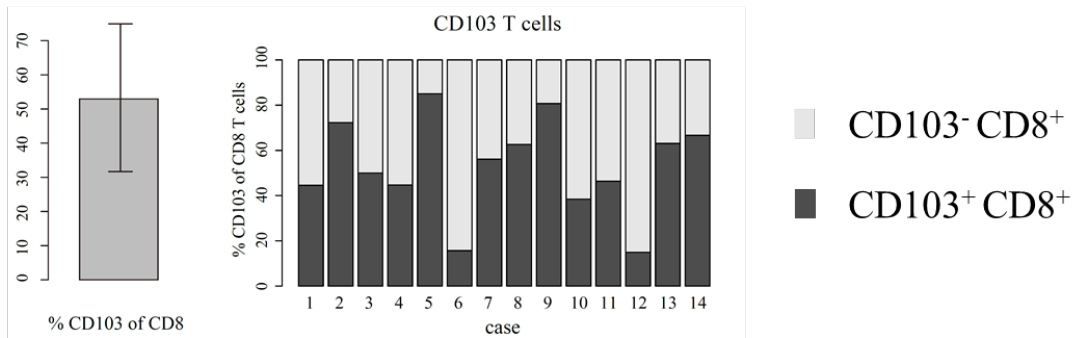

**c**

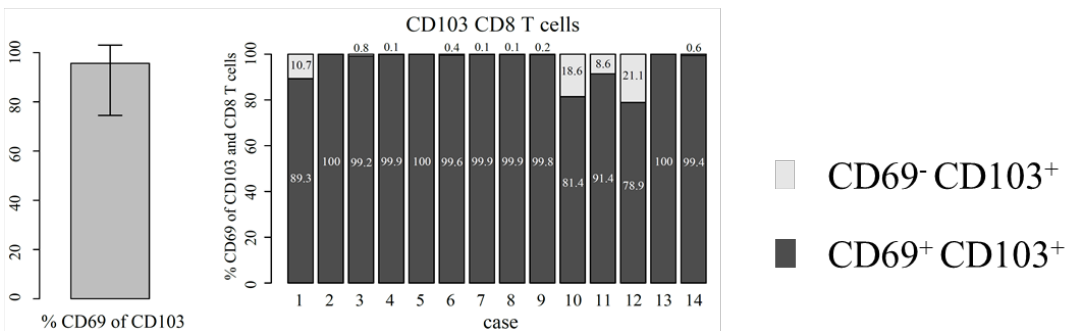

**Supplementary Fig. 2.** Overall survival by expression of ITGAE in colorectal cancer tissues in each database

The median value of ITGAE expression was used to divide patients into two groups for comparison. In all databases, overall survival tended to be prolonged in patients with higher ITGAE, while in the TCGA database, overall survival was significantly prolonged in patients with higher ITGAE.

**a.** GSE41258 **b.** GSE28814 **c.** TCGA

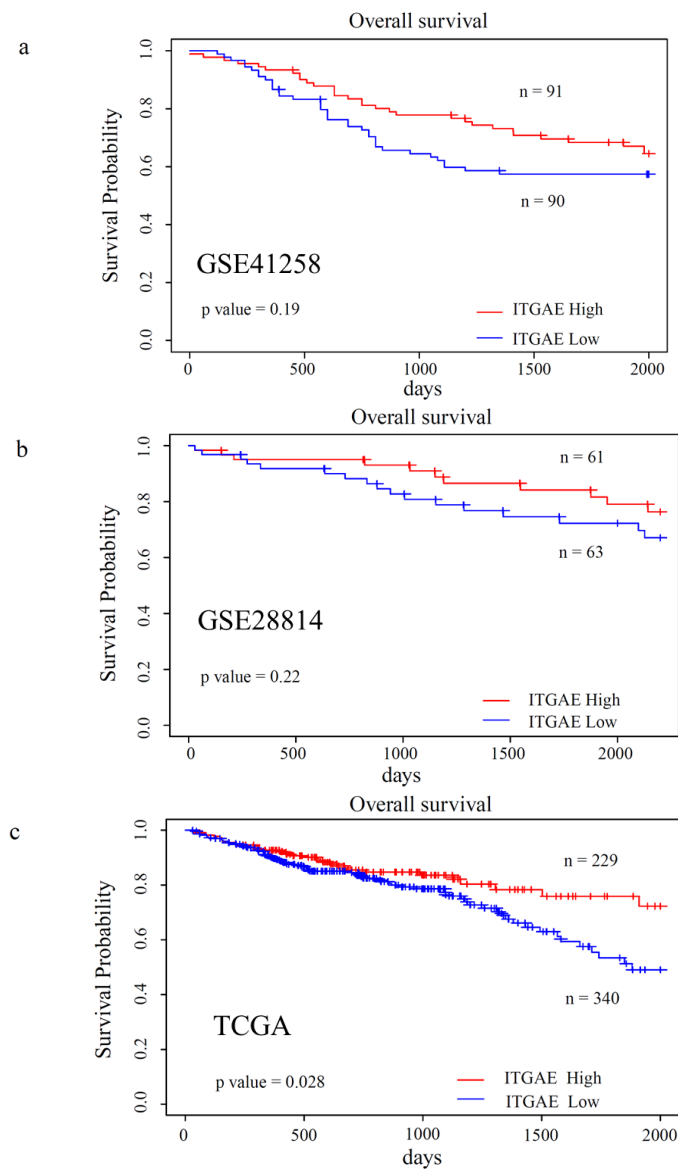

**Supplementary Fig. 3.** Immunohistochemical staining of infiltration CD103<sup>+</sup>/CD8<sup>+</sup> lymphocytes with CD103 and CD8 antibodies in colorectal cancer

**a.** CD103<sup>+</sup> and CD8<sup>+</sup> cell counts were evaluated in serial sections. Representative images of highly infiltrated cases are shown on the left and lowly infiltrated cases are shown on the right. **b.** There was a significant correlation between CD103<sup>+</sup> and CD8<sup>+</sup> cell counts.

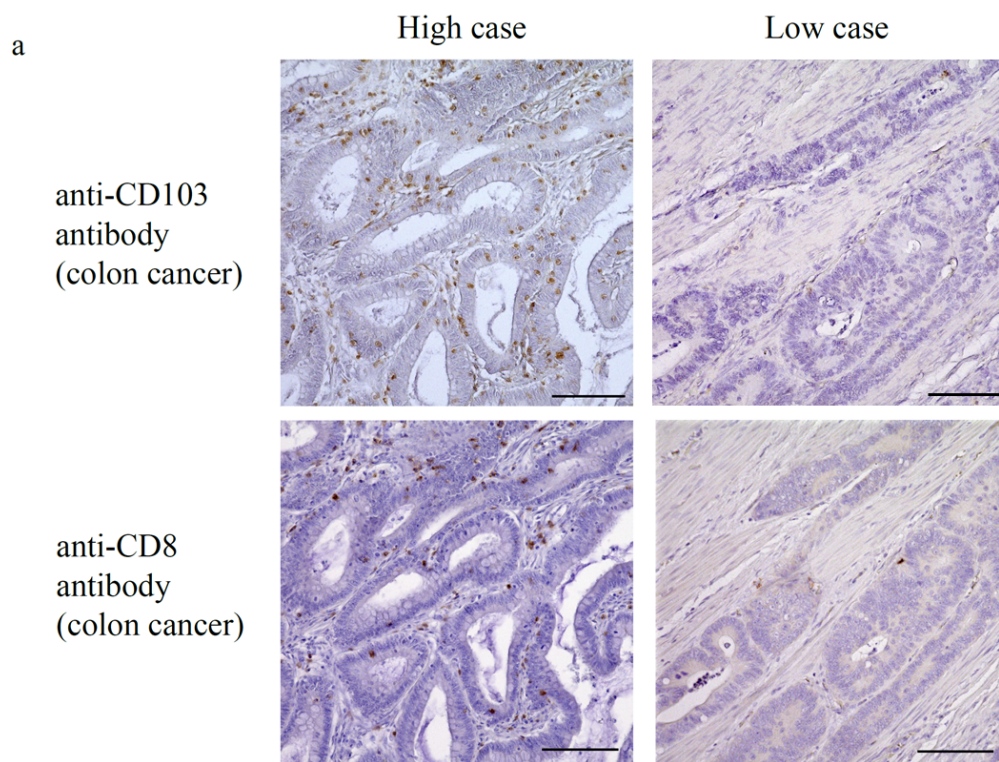

**b**

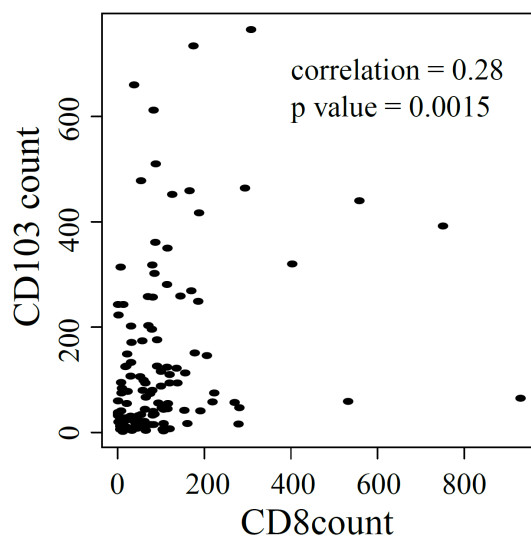

**Supplementary Fig. 4.** Number of CD103<sup>+</sup> tumor-infiltrating lymphocytes (TILs), overall survival (OS) and recurrence-free survival (RFS)

**a.** The number of CD103<sup>+</sup> cells and OS. **b.** The number of CD103<sup>+</sup> cells and RFS. In the group with higher CD103<sup>+</sup> cell count, both overall survival and relapse-free survival were significantly prolonged.

a

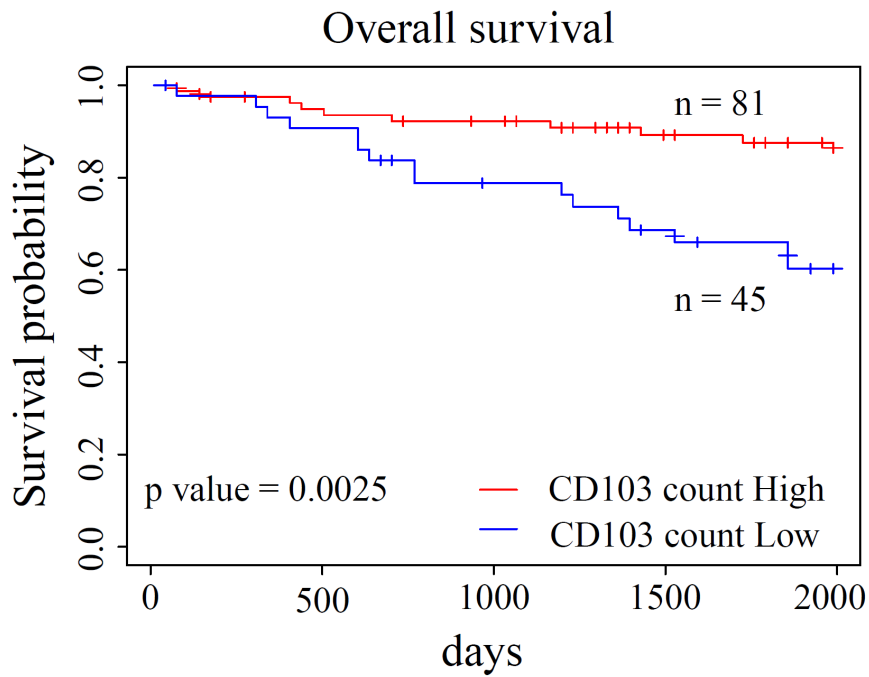

b

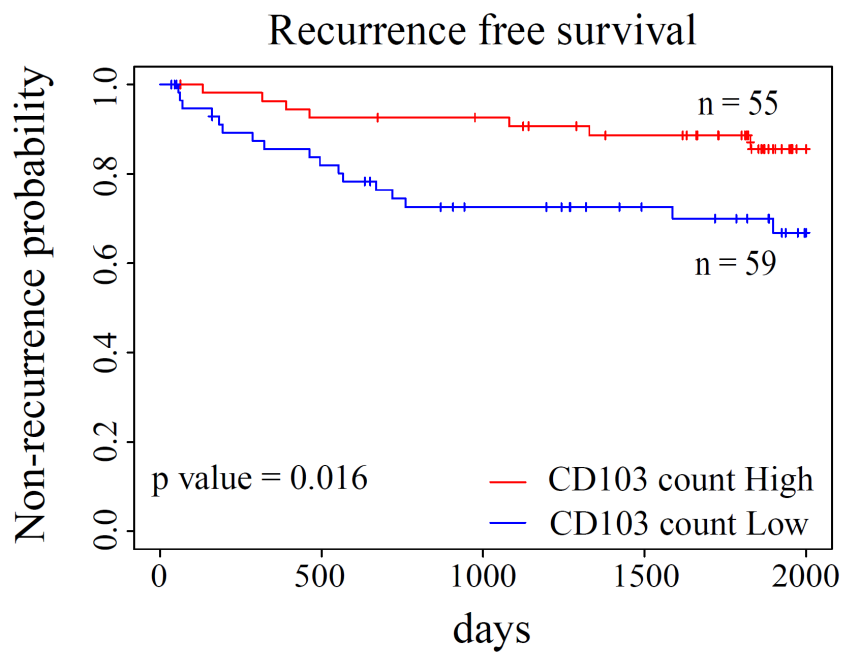

**Supplementary Fig. 5.** Comparison of CD8<sup>+</sup> and CD103<sup>+</sup> cell counts with pathological factors

**a, c.** The number of CD103-positive cells showed a significant relationship with lymphatic invasion and lymph node metastasis. **d.** In addition, both the CD8 and CD103 positive cell counts showed a significant relationship with distant metastasis.

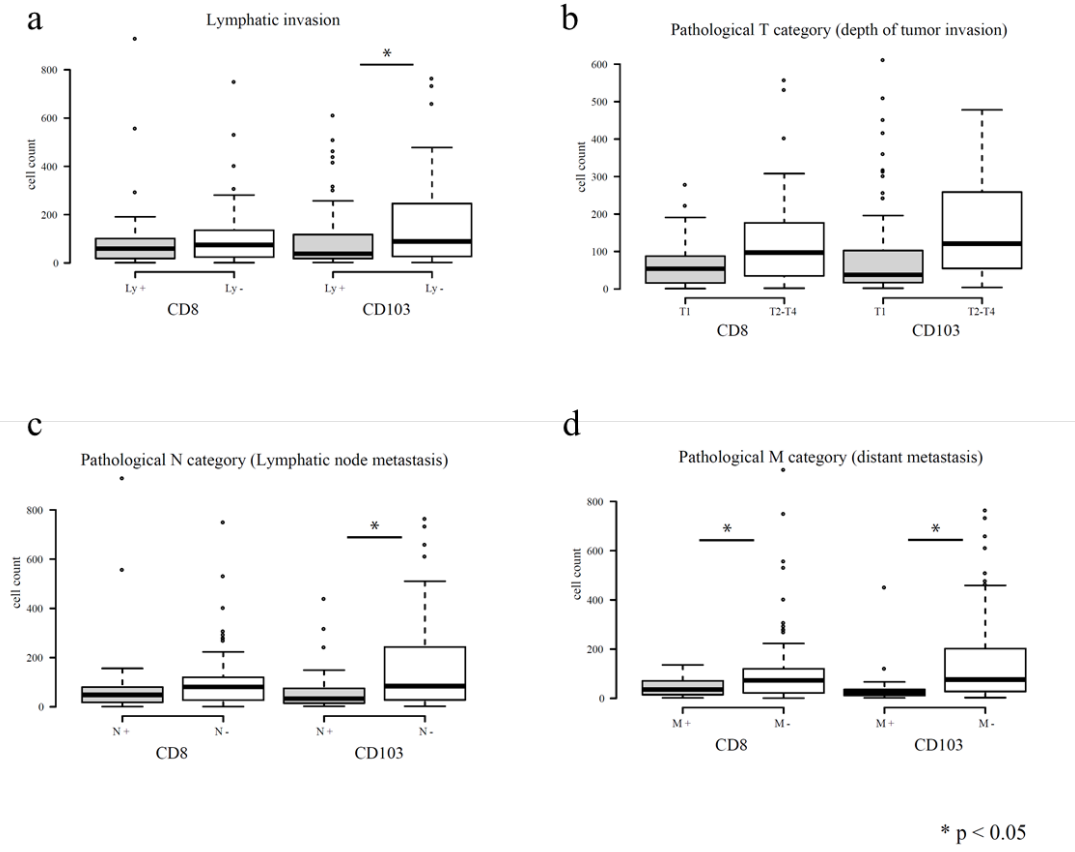

**Supplementary Fig. 6.** The TCR and IFNG signals and expression of ZNF683 in Trm in the GSE108989, GSE146771, and GSE164522 databases.

**a.** Gene expression distribution of Trm-related genes and cytotoxicity and exhaustion markers on TILs in colorectal cancer. **b.** Comparison of TBX21 and IFNG expression with that of ZNF683 in Trm. **c.** GSEA showed that compared with ZNF683+ Trm cells, ZNF683- Trm cells showed significantly higher TCR signaling and IFN- $\gamma$  signaling. **d.** Schematic view of Trm cells in cancer tissue. TCR signaling induces cancer-specific Trm cells to express ZNF683, which in turn expresses IFNG. IFNG signaling induces TBX21 expression and positive feedback to ZNF683, which further enhances cytotoxicity.

**a**

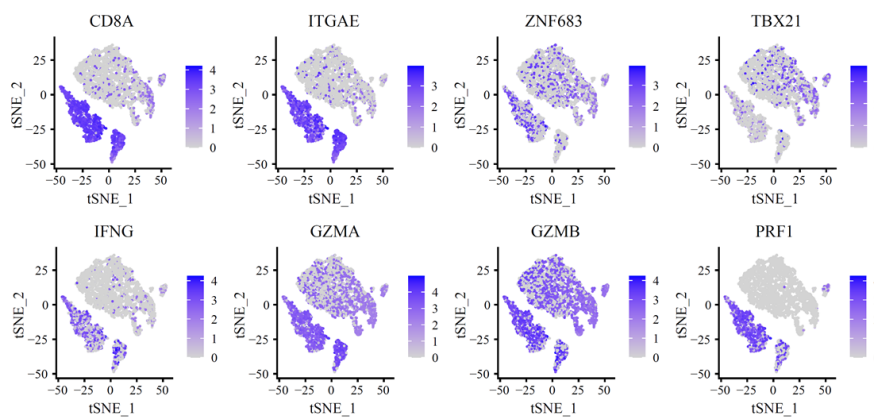

**b**

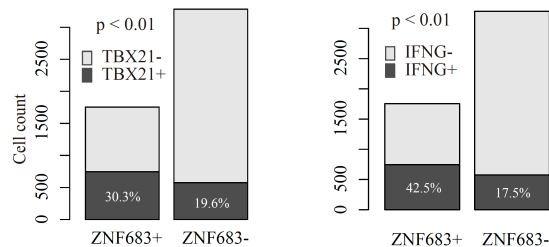

**c**

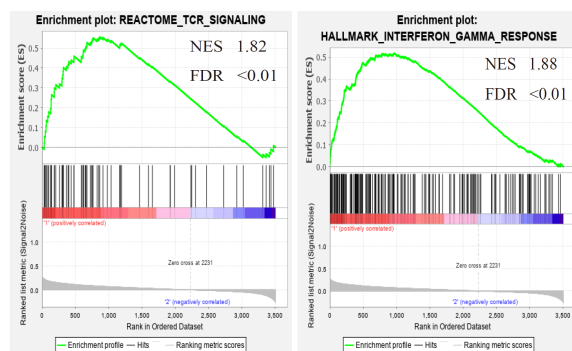

**d**

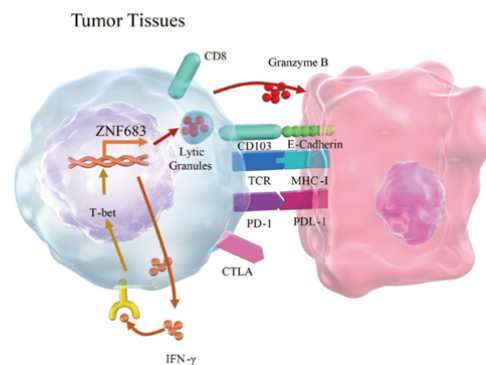

**Supplementary Table 1.** Baseline demographic and clinical characteristics of 126 patients with colorectal cancer.

|                                                      | N=126                 |
|------------------------------------------------------|-----------------------|
| Age, median [year-old]                               | 65 (26- 87)           |
| Sex [ Male / Female ]                                | 77 / 49               |
| BMI, median [kg/m <sup>2</sup> ]                     | 22.3 (16.4 – 34.2 )   |
| Location [ colon / rectum ]                          | 70 / 56               |
| Histological type [tub1 / tub2 / por, muc / NA]      | 61 / 51 / 11 / 3      |
| Greatest diameter, median [mm]                       | 35 (3 – 135)          |
| Preoperative CEA, median (ng/ml)                     | 3 (0.1-386)           |
| Preoperative CA19-9, median (ng/ml)                  | 15 (1-15400)          |
| Depth of invasion [ T1 / T2 / T3 / T4 / NA ]         | 47 / 19 / 49 / 9      |
| Lymphatic invasion [ + / - ]                         | 63 / 63               |
| Vascular invasion [ + / - ]                          | 28 / 98               |
| Lymph node metastasis [ + / - ]                      | 38 / 88               |
| Distant metastasis [ + / - ]                         | 16 / 110              |
| Pathological Stage [ 0 / I / II / III / IV ]         | 8 / 50 / 23 / 29 / 16 |
| Number of CD103 <sup>+</sup> , median [cells/ 10HPF] | 60 (2-765)            |
| Number of CD8 <sup>+</sup> , median [cells/10HPF]    | 62.5 (1-930)          |

HPF, high power field

**Supplementary Table 2.** Comparison of patients' backgrounds between the high and low CD8<sup>+</sup>/CD103<sup>+</sup> TILs in colorectal cancer

|                                                                | HH<br>CD103 <sup>+</sup> ( $\geq 60/10$ HPF)<br>and CD8 <sup>+</sup> ( $\geq 62.5/10$ HPF) | LL<br>CD103 <sup>+</sup> ( $< 60/10$ HPF)<br>and CD8 <sup>+</sup> ( $< 62.5/10$ HPF) | P<br>-value |
|----------------------------------------------------------------|--------------------------------------------------------------------------------------------|--------------------------------------------------------------------------------------|-------------|
| Age [ $\geq 65/ < 65$ ]                                        | 25 (61.0%) /16<br>(39.0%)                                                                  | 19 (46.3%) /22<br>(53.7%)                                                            | 0.268       |
| Sex [male / female]                                            | 27 (65.9%) /14<br>(34.1%)                                                                  | 24 (58.5%) /17<br>(41.5%)                                                            | 0.649       |
| BMI [ $\leq 25$ kg/m <sup>2</sup> / $> 25$ kg/m <sup>2</sup> ] | 36 (87.8%) /5<br>(12.2%)                                                                   | 31 (81.6%) /7<br>(18.4%)                                                             | 0.537       |
| Location [colon / rectum]                                      | 19 (46.3%) /22<br>(53.7%)                                                                  | 23 (56.1%) /18<br>(43.9%)                                                            | 0.508       |
| Histological type [tub1-2 / por, muc]                          | 37 (92.5%) /3<br>(7.5%)                                                                    | 34 (87.2%) /5<br>(12.8%)                                                             | 0.481       |
| Greatest diameter [ $\geq 35 / < 35$ ]<br>(mm)                 | 20 (48.8%) /21<br>(51.2%)                                                                  | 28 (73.7%) /10<br>(26.3%)                                                            | 0.037       |
| Pathological T stage [T1 / T2-4]                               | 22 (53.7%) /19<br>(46.3%)                                                                  | 8 (20.0%) /32<br>(80.0%)                                                             | 0.002       |
| Lymphatic invasion [ + / - ]                                   | 19 (46.3%) /22<br>(53.7%)                                                                  | 26 (66.7%) /13<br>(33.3%)                                                            | 0.076       |
| Vascular invasion [ + / - ]                                    | 8 (19.5%) /33<br>(80.5%)                                                                   | 12 (30.8%) /27<br>(69.2%)                                                            | 0.306       |
| Lymphatic node metastasis [ + / - ]                            | 9 (22.0%) /32<br>(88.0%)                                                                   | 19 (47.5%) /21<br>(52.5%)                                                            | 0.020       |
| Distant metastasis [ + / - ]                                   | 3 (7.3%) /38<br>(92.7%)                                                                    | 12 (29.3%) /29<br>(70.7%)                                                            | 0.020       |
| Pathological Stage [ I / II, III, IV]                          | 24 (58.5%) /17<br>(41.5%)                                                                  | 9 (22.0%) /32<br>(78.0%)                                                             | 0.001       |

HPF, high power field



**Supplementary Table 3.** Factors evaluated for RFS (univariate and multivariate analyses).

| RFS<br>Variables                                                         | Univariate analysis |           |         | Multivariate analysis |           |         |
|--------------------------------------------------------------------------|---------------------|-----------|---------|-----------------------|-----------|---------|
|                                                                          | HR                  | 95% CI    | P-value | HR                    | 95% CI    | P-value |
| Age ( $\geq 65$ years)                                                   | 1.25                | 0.60–2.63 | 0.551   |                       |           |         |
| Sex (male)                                                               | 1.27                | 0.55–2.74 | 0.546   |                       |           |         |
| BMI ( $>25$ kg/m <sup>2</sup> )                                          | 1.39                | 0.48–4.00 | 0.546   |                       |           |         |
| Tumor location (rectum)                                                  | 1.40                | 0.67–2.95 | 0.372   |                       |           |         |
| Histological type<br>(Undifferentiated)                                  | 1.70                | 0.50–4.40 | 0.359   |                       |           |         |
| Greatest tumor diameter ( $\geq 35$ mm)                                  | 2.63                | 1.16–5.96 | 0.020   | 1.70                  | 0.49–5.89 | 0.397   |
| Pathological T category (T2–T4)                                          | 3.38                | 1.01–11.3 | 0.049   | 5.13                  | 0.92–28.6 | 0.062   |
| Lymphatic invasion (+)                                                   | 2.47                | 1.12–5.45 | 0.025   | 1.90                  | 0.53–6.90 | 0.327   |
| Vascular invasion (+)                                                    | 2.81                | 1.30–6.08 | 0.009   | 2.39                  | 0.85–6.73 | 0.098   |
| Lymph node metastasis (+)                                                | 1.68                | 0.79–3.56 | 0.180   |                       |           |         |
| LL (CD103 <sup>+</sup> $<60$ / 10HPF and CD8 <sup>+</sup> $<62$ / 10HPF) | 3.42                | 1.21–9.62 | 0.020   | 2.94                  | 1.01–8.51 | 0.047   |

RFS, recurrence-free survival; HR, hazard ratio; CI, confidence interval; BMI, body mass index; LL, the numbers of both CD103<sup>+</sup> and CD8<sup>+</sup> cells were low; HPF, high power field

**Supplementary Table 4.** Clinical characteristics of 2 patients with colorectal cancer for single-call RNA-seq analysis.

|                                                     | Case 1     | Case2            |
|-----------------------------------------------------|------------|------------------|
| Age [year-old]                                      | 80         | 54               |
| Sex                                                 | Female     | Male             |
| Location                                            | Colon      | Rectum           |
| Histological type                                   | tub1       | tub1>tub2        |
| Greatest diameter, median [mm]                      | 30         | 50               |
| Depth of invasion                                   | MP (T2)    | SS (T3)          |
| Lymph node metastasis                               | None       | None             |
| Distant metastasis                                  | None       | Liver metastasis |
| Pathological Stage                                  | Stage I    | Stage IV         |
| Number of CD103 <sup>+</sup> , median [cells/10HPF] | 350 (High) | 31 (Low)         |
| Number of CD8 <sup>+</sup> , median [cells/10HPF]   | 283 (High) | 34 (Low)         |

HPF, high power field
